# Supplementary material for: Ambient-air-stable inorganic Cs2SnI6double perovskite thin filmsviaaerosol-assisted chemical vapour deposition
Source: Royal Society of Chemistry journal article supplement (doi:10.1039/c8ta03133a), 2018-01-01
Supplement: c8ta03133a1.pdf [file c8ta03133a1.pdf]

## Ambient-Air-Stable Inorganic $\text{Cs}_2\text{SnI}_6$ Double Perovskite Thin Films via Aerosol-Assisted Chemical Vapour Deposition

Jack Chun-Ren Ke, David J. Lewis, Alex S. Walton, Ben F. Spencer, Paul O'Brien

Andrew G. Thomas\* and Wendy R. Flavell\*

### Electronic Supplementary Information†

#### Peeling and scratching tests for adhesion to the substrate.

In order to evaluate adherence between  $\text{Cs}_2\text{SnI}_6$  film and ITO-glass substrate, we conducted sticking and scratching tests for films fabricated by AACVD and spin coating. The sticking test was carried out using adhesive tape of width of 1 cm. This was fastened to the films and then peeled off rapidly. For the scratching test, a needle was used to scratch the films by moderate force.

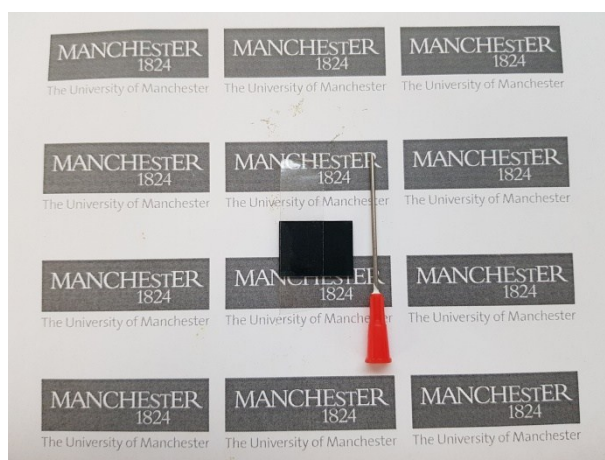

(A)

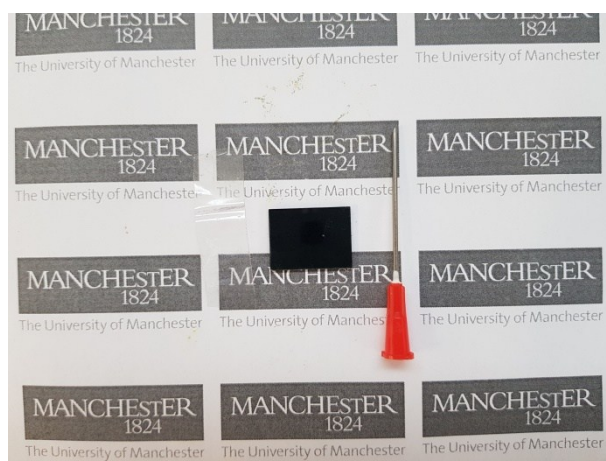

(B)

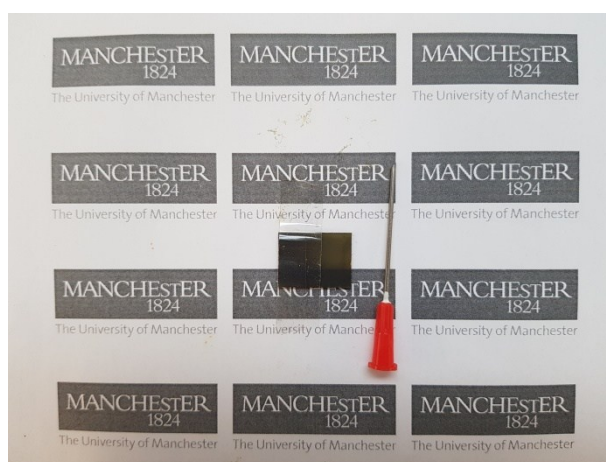

(C)

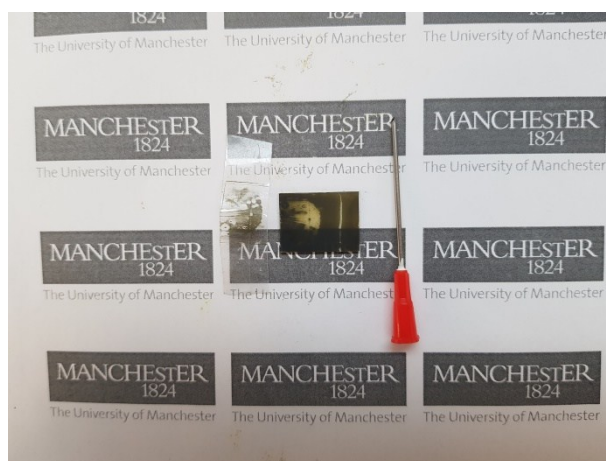

(D)

**Figure S1** Photographs of  $\text{Cs}_2\text{SnI}_6$  films fabricated *via* AACVD (A&B) and spin coating (C&D). A shows the as fabricated AACVD film and B following the peel and scratch tests. C and D are equivalent tests

for the spin-coated film. It is clear that the AACVD-grown film shows very little change following the scratch and peel tests. The tape remains clear of black powder and no line can be seen on the substrate following scratching. The spin coated film, on the other hand, shows significant removal by both the tape and scratching.

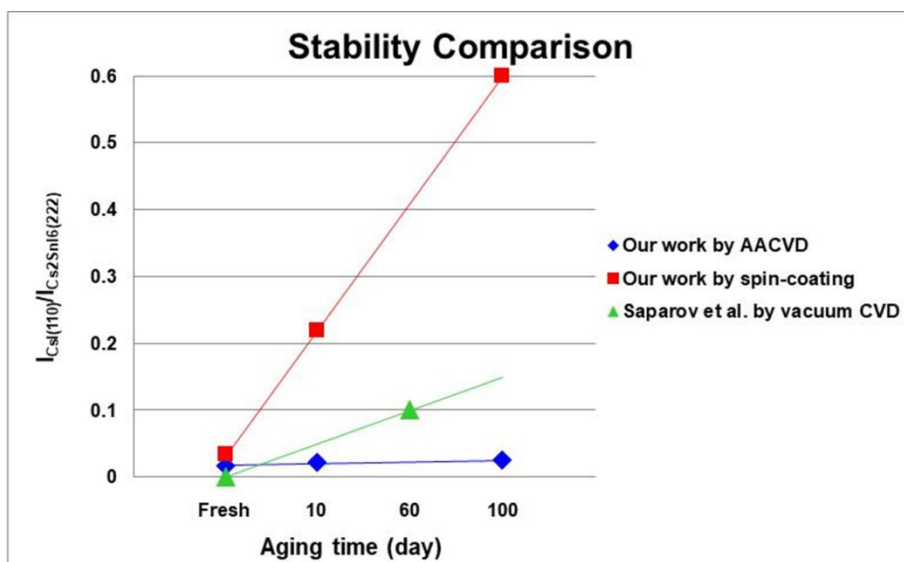

**Figure S2** CsI-impurity-level comparison between the work reported by Saparov *et al.* through vacuum CVD and this work *via* AACVD and spin-coating showing the values of  $I_{CsI(110)}/I_{Cs2SnI6(222)}$  determined from the XRD results as a function of aging up to around 100 days, as shown in Table 1. Note the data points obtained from the work of Saparov and the co-workers are estimated through measurement of the height of the corresponding reflections.

**Table S1** Quantified atomic concentrations of various elements from the XPS spectra of Cs 3d (Figure 5), Sn 3p<sub>3/2</sub> (Figure S3), and I 3d core levels. All elemental concentrations are normalised to [Cs] = 2.0 as in the ideal stoichiometry Cs<sub>2</sub>SnI<sub>6</sub>. Excess Sn (excess I) refers to the amount of Sn (I) that cannot be accounted for in the Cs<sub>2</sub>SnI<sub>6</sub> (Cs<sub>2</sub>SnI<sub>6</sub>+CsI) phase(s).

| Sample ID                      | Total Cs  | Cs<br>in CsI | Cs<br>in Cs <sub>2</sub> SnI <sub>6</sub> | Sn         | I          | Excess<br>Sn | Excess<br>I |
|--------------------------------|-----------|--------------|-------------------------------------------|------------|------------|--------------|-------------|
| <b>Ideal<br/>stoichiometry</b> | -         | -            | <b>2.0</b>                                | <b>1.0</b> | <b>6.0</b> | <b>0.0</b>   | <b>0.0</b>  |
| AACVD (+HI)<br>fresh           | 2.3 ± 0.2 | 0.3 ± 0.1    | 2.0 ± 0.2                                 | 4.1 ± 0.4  | 18.2 ± 1.8 | 3.1 ± 0.3    | 11.9 ± 1.2  |
| AACVD (+HI)<br>100 days        | 2.4 ± 0.2 | 0.4 ± 0.1    | 2.0 ± 0.2                                 | 2.3 ± 0.2  | 6.8 ± 0.7  | 1.3 ± 0.1    | 0.4 ± 0.1   |
| AACVD (-HI)<br>fresh           | 2.7 ± 0.3 | 0.7 ± 0.1    | 2.0 ± 0.2                                 | 8.9 ± 0.9  | 9.2 ± 0.9  | 7.9 ± 0.8    | 2.5 ± 0.3   |
| Spin-coated<br>(+HI) fresh     | 2.4 ± 0.2 | 0.4 ± 0.1    | 2.0 ± 0.2                                 | 3.4 ± 0.3  | 7.2 ± 0.7  | 2.4 ± 0.2    | 0.8 ± 0.1   |
| Spin-coated<br>(+HI) 10 days   | 2.7 ± 0.3 | 0.7 ± 0.1    | 2.0 ± 0.2                                 | 2.8 ± 0.3  | 7.2 ± 0.7  | 1.8 ± 0.2    | 0.5 ± 0.1   |

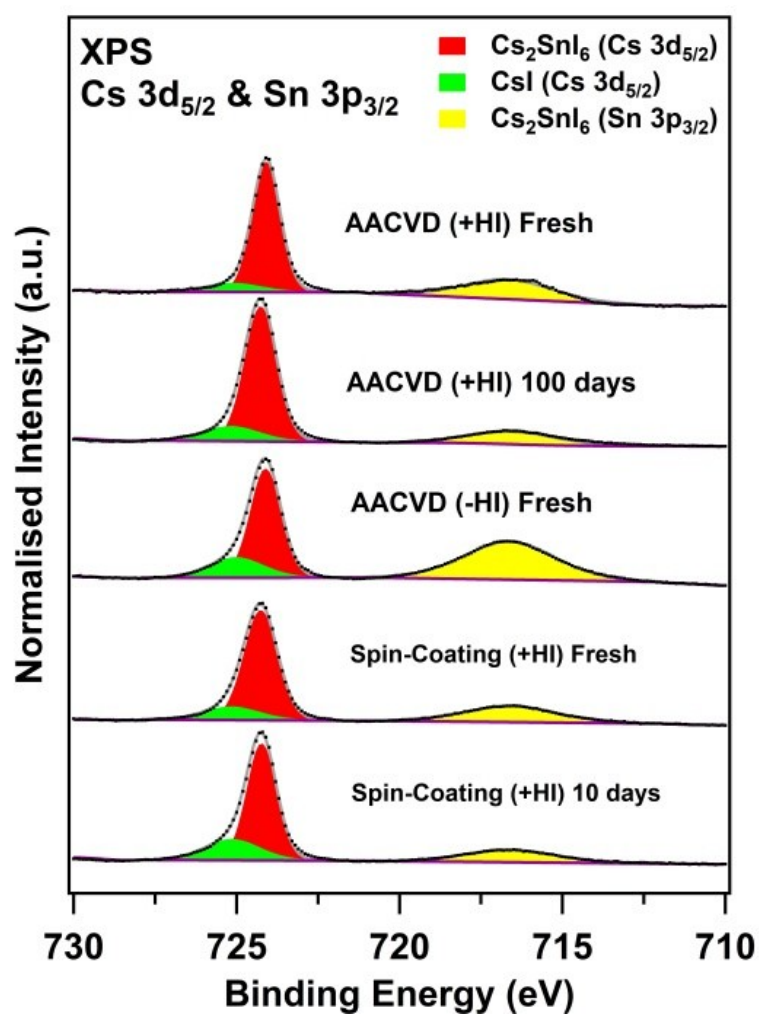

**Figure S3** Sn 3p<sub>3/2</sub> with Cs 3d<sub>5/2</sub> core-level XPS spectra of various films prepared by AACVD or spin-coating. All spectra are normalised to the Cs 3d<sub>5/2</sub> area for comparison of the relative concentrations of atomic Sn.

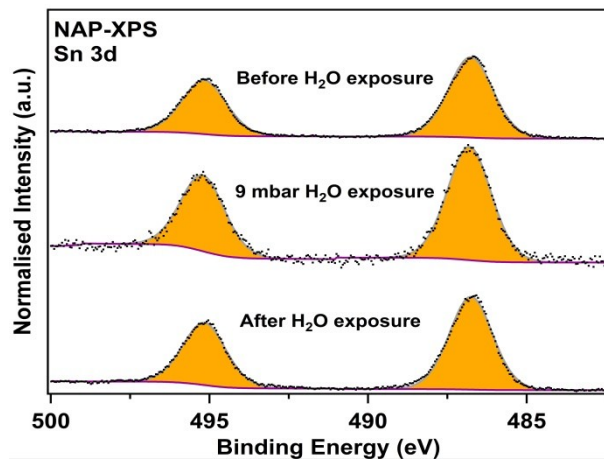

(A)

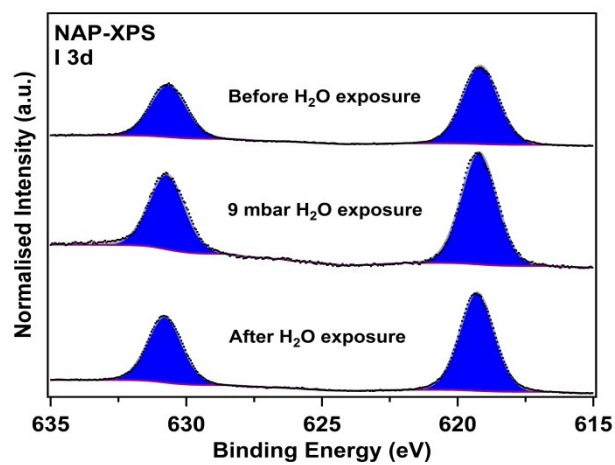

(B)

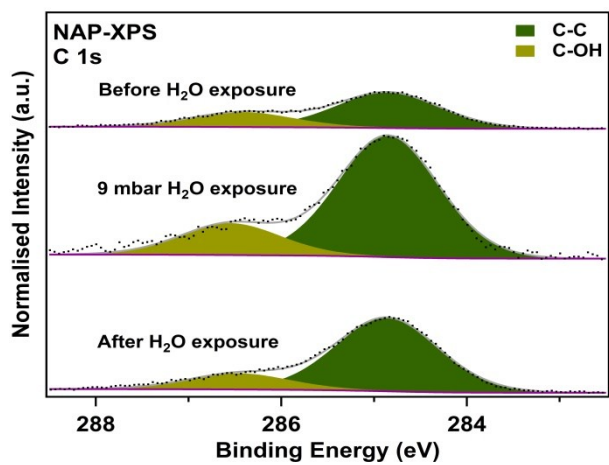

(C)

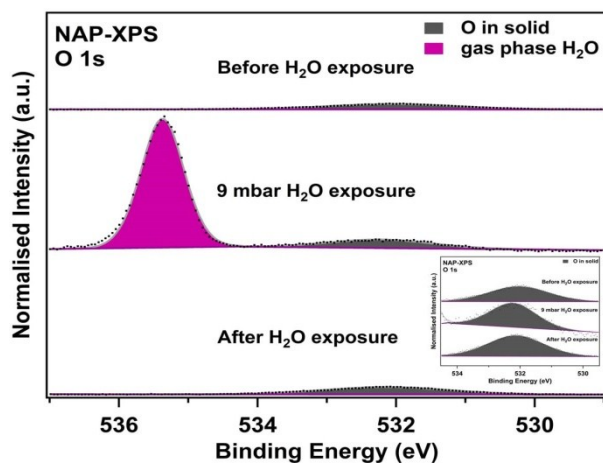

(D)

**Figure S4**(A) Sn 3d, (B) I 3d, (C) C 1s, and (D) O 1s core-level NAP-XPS spectra of AACVD (+HI)-grown film, recorded before, during, and after exposure to 9 mbar H<sub>2</sub>O vapour. All spectra are normalised to the relevant Cs 3d<sub>5/2</sub> area for comparison.

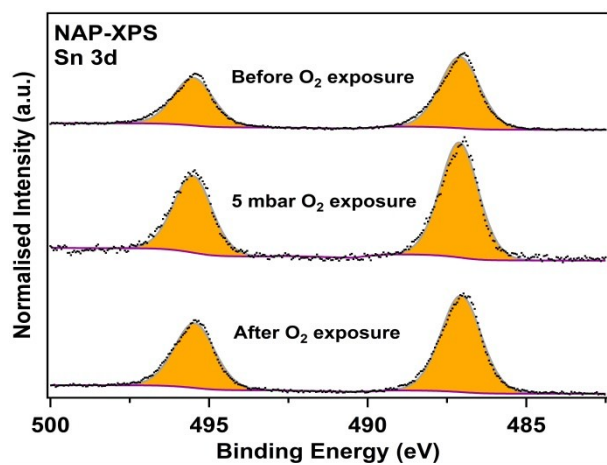

(A)

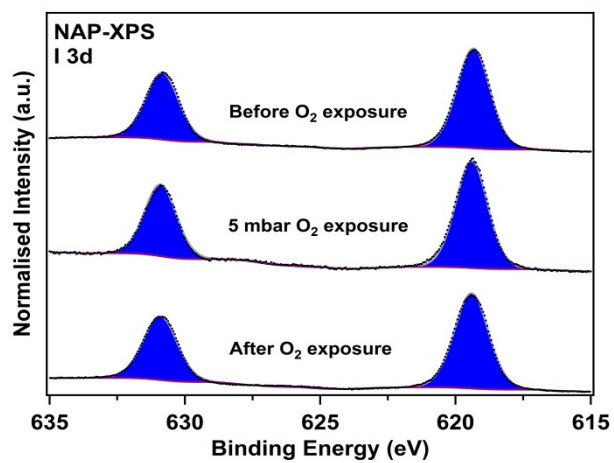

(B)

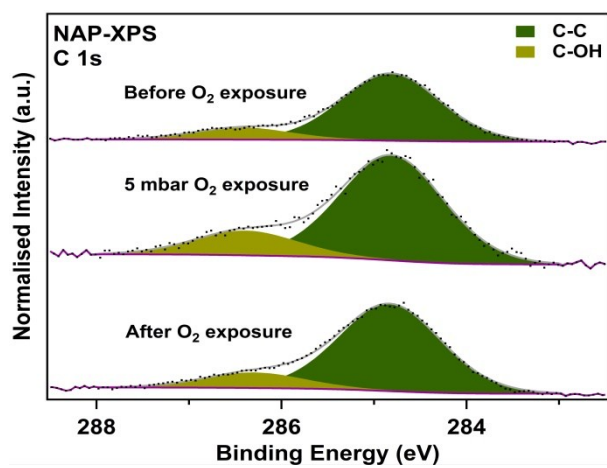

(C)



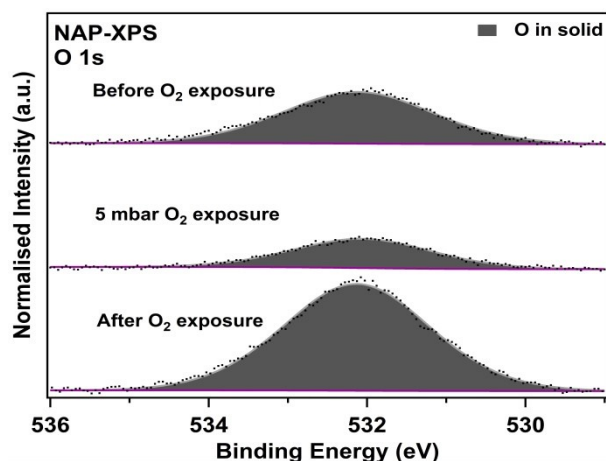

(D)

**Figure S5** (A) Sn 3d, (B) I 3d, (C) C 1s, and (D) O 1s core-level NAP-XPS spectra of AACVD (+HI)-grown film, recorded before, during, and after exposure to 5 mbar O<sub>2</sub>. All spectra are normalised to the relevant Cs 3d<sub>5/2</sub> area for comparison.

**Table S2** Quantified atomic concentrations of C–O (BE:  $286.3 \pm 0.1$  eV) from the C 1s NAP-XPS spectra and O–C (BE:  $532.1 \pm 0.1$  eV) from the O 1s NAP-XPS spectra of AACVD (+HI)-grown films. All elements are normalised to Cs (using [Cs] = 2.0), consistent with Tables 1&2. Spectra were measured under UHV conditions before and after exposure to water or O<sub>2</sub>.

| Fresh AACVD (+HI)                    | C–O            | O–C            |
|--------------------------------------|----------------|----------------|
| UHV before H <sub>2</sub> O exposure | $15.8 \pm 1.6$ | $12.0 \pm 1.2$ |
| UHV after H <sub>2</sub> O exposure  | $26.5 \pm 2.7$ | $16.1 \pm 1.6$ |
| UHV before O <sub>2</sub> exposure   | $5.4 \pm 0.5$  | $4.7 \pm 0.5$  |
| UHV after O <sub>2</sub> exposure    | $9.2 \pm 0.9$  | $9.2 \pm 0.9$  |
